# Supplementary material for: Liposomal and Liposomes-Film Systems as Carriers for Bioactives from Paeonia tenuifolia L. Petals: Physicochemical Characterization and Biological Potential
Source: MDPI journal article supplement (doi:10.3390/pharmaceutics15122742), 2023-12-07
Supplement: s1 [file s1]

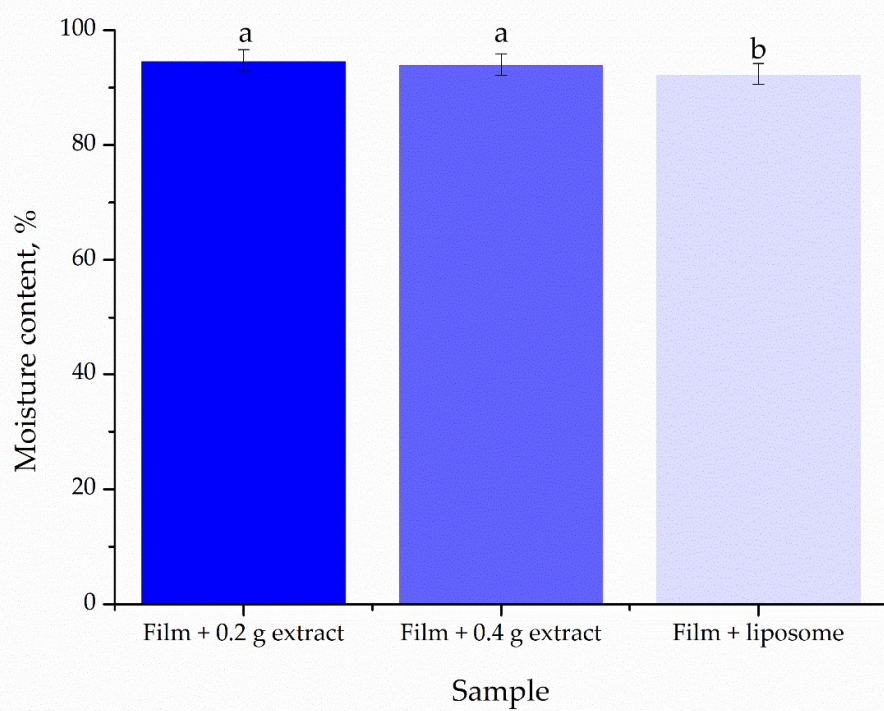

Figure S1 Moisture content of the *Paeonia tenuifolia* L. extract - and liposome - loaded films; different letters show statistically significant difference ( $p < 0.05$ ;  $n = 3$ , one-way ANOVA, analysis of variance, Duncan's post hoc test)
