# Supplementary material for: Liposomal and Liposomes-Film Systems as Carriers for Bioactives from Paeonia tenuifolia L. Petals: Physicochemical Characterization and Biological Potential
Source: MDPI journal article supplement (doi:10.3390/pharmaceutics15122742), 2023-12-07
Supplement: s1 [file s1]

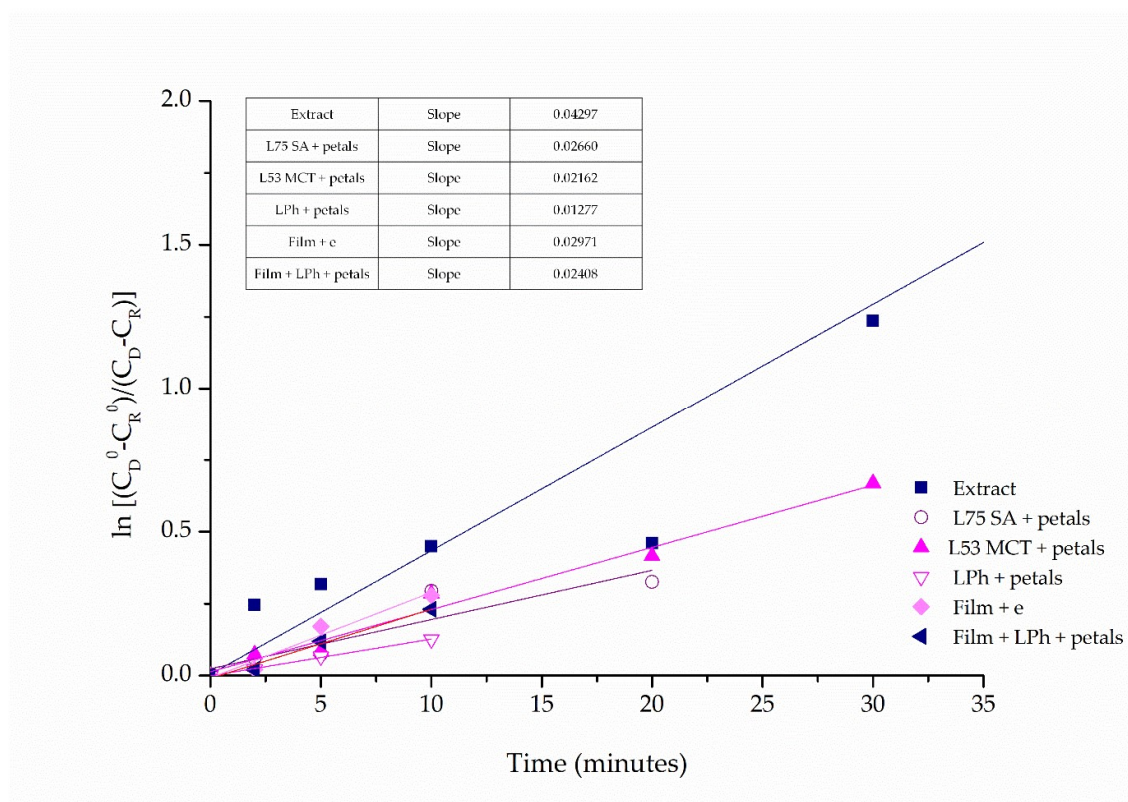

Figure S3 Dimensionless plot of total polyphenol concentration from *Paeonia tenuifolia* L. petal extract, extract-loaded liposomes, extract-loaded films, as well as liposome-loaded films, versus time for the release curves. (where  $C_D^0$  stands for the starting concentration of the polyphenols in the donor part of the Franz diffusion cell,  $C_R^0$  for the starting concentration of polyphenols in the acceptor part of the Franz cell, the  $C_D$  and  $C_R$  stand for concentration of the polyphenols in the donor and acceptor part after a period of time,  $t$ ; L stands for liposome, Ph for Phospholipon, e for extract)
