# Supplementary figures and images for: Liposomal and Liposomes-Film Systems as Carriers for Bioactives from Paeonia tenuifolia L. Petals: Physicochemical Characterization and Biological Potential
Source: MDPI journal article supplement (doi:10.3390/pharmaceutics15122742), 2023-12-07

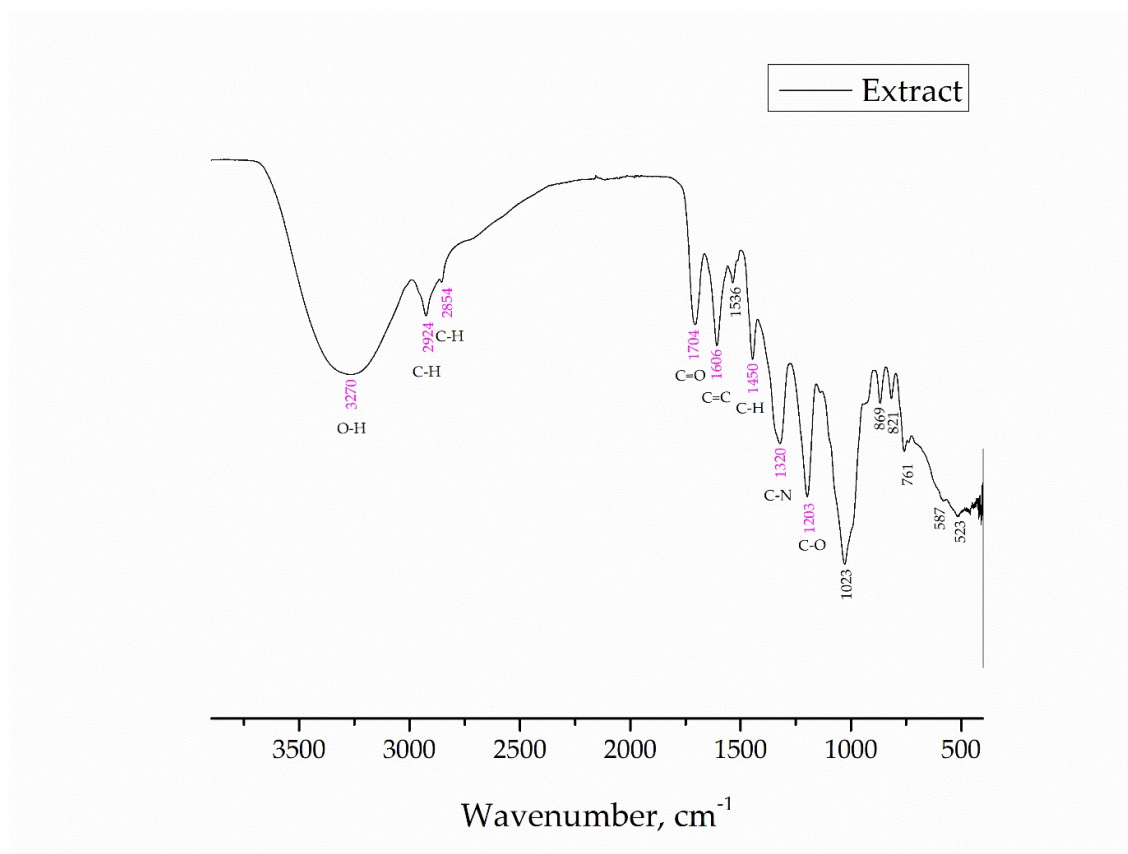

Figure S2 FTIR spectra of *Paeonia tenuifolia* L. petal extract

Supplement: s1 [file s1]
